# Supplementary material for: Monitoring the production process of selenized yeast by elemental speciation analysis
Source: Royal Society of Chemistry journal article supplement (doi:10.1039/c2mt20138k), 2012-01-01
Supplement: c2mt20138k.pdf [file c2mt20138k.pdf]

## Supplementary

**Table 1:** Fermentation parameters for different yeast strains

| Fermentation [h] | Strains | SeMet/ $\mu\text{g g}^{-1}$ | S <sub>total</sub> $\mu\text{g g}^{-1}$ | Met/ $\mu\text{g g}^{-1}$ | Cys/ $\mu\text{g g}^{-1}$ | S <sub>total</sub> / $\mu\text{g g}^{-1}$ | SeMet/ % | Cell Viability/ % | S/Se  | Met/SeMet |
|------------------|---------|-----------------------------|-----------------------------------------|---------------------------|---------------------------|-------------------------------------------|----------|-------------------|-------|-----------|
| 23               | Sey 38  | 0                           | 10                                      | 6600                      | 6400                      | 4000                                      | 0        | 99.20             | 985.0 | -         |
|                  | Bio 19  | 0                           | 0                                       | -                         | -                         | -                                         | 0        | -                 | -     | -         |
|                  | 696     | 0                           | 10                                      | 6900                      | 7600                      | 3900                                      | 0        | 98.76             | 960.3 | -         |
| 28               | Sey 38  | 1400                        | 1100                                    | 4100                      | 4000                      | 2100                                      | 51       | 98.69             | 4.7   | 3.8       |
|                  | Bio 19  | 0                           | 10                                      | 5700                      | 5900                      | 3300                                      | 0        | 98.87             | 812.6 | -         |
|                  | 696     | 800                         | 800                                     | 4800                      | 4900                      | 2100                                      | 40       | 99.51             | 6.5   | 7.9       |
| 31               | Sey 38  | 1900                        | 1100                                    | 3700                      | 3800                      | 1900                                      | 70       | 98.76             | 4.3   | 2.6       |
|                  | Bio 19  | 1000                        | 700                                     | 4100                      | 4700                      | 2600                                      | 58       | 99.55             | 9.1   | 5.4       |
|                  | 696     | 700                         | 1000                                    | 3800                      | 4200                      | 1800                                      | 28       | 99.26             | 4.4   | 7.1       |
| 47               | Sey 38  | 2700                        | 1200                                    | 3300                      | 2800                      | 1800                                      | 91       | 80.92             | 3.7   | 1.6       |
|                  | Bio 19  | 2600                        | 1000                                    | 2800                      | 3000                      | 1600                                      | 105      | 97.98             | 3.9   | 1.4       |
|                  | 696     | 2800                        | 1100                                    | 2700                      | 2600                      | 1600                                      | 102      | 96.57             | 3.6   | 1.3       |
| 53               | Sey 38  | 2600                        | 1200                                    | 3000                      | 2700                      | 1600                                      | 87       | 75.93             | 3.3   | 1.5       |
|                  | Bio 19  | 2800                        | 1100                                    | 2600                      | 2800                      | 1600                                      | 102      | 95.84             | 3.6   | 1.2       |
|                  | 696     | 2100                        | 1400                                    | 2500                      | 2600                      | 2100                                      | 60       | 98.02             | 3.7   | 1.6       |
| 72               | Sey 38  | 2500                        | 1400                                    | 2500                      | 2500                      | 1600                                      | 73       | 62.44             | 2.8   | 1.3       |
|                  | Bio 19  | 3100                        | 1300                                    | 1900                      | 2500                      | 1100                                      | 98       | 86.55             | 2.2   | 0.8       |
|                  | 696     | 3000                        | 1500                                    | 2300                      | 2900                      | 1400                                      | 77       | 92.48             | 2.3   | 1.0       |

**Table 2:** Methionine and cysteine distribution in the yeast cell

| Fermentation [h] | Methionine [ $\mu\text{mol g}^{-1}$ ] Proteome |        |      | Metabolome |        |      | Sum    |        |      |
|------------------|------------------------------------------------|--------|------|------------|--------|------|--------|--------|------|
|                  | Sey 38                                         | Bio 19 | 696  | Sey 38     | Bio 19 | 696  | Sey 38 | Bio 19 | 696  |
| 23               | 37.2                                           | 0.0    | 35.9 | 6.8        | 0.0    | 10.2 | 44.0   | 0.0    | 46.1 |
| 28               | 20.2                                           | 31.7   | 22.5 | 7.1        | 6.4    | 9.7  | 27.3   | 38.0   | 32.3 |
| 31               | 20.1                                           | 26.0   | 23.9 | 4.8        | 1.8    | 1.4  | 24.9   | 27.8   | 25.4 |
| 47               | 17.0                                           | 16.6   | 15.8 | 4.8        | 1.8    | 1.9  | 21.8   | 18.4   | 17.8 |
| 53               | 17.7                                           | 15.0   | 15.5 | 2.1        | 2.1    | 1.3  | 19.8   | 17.2   | 16.8 |
| 71               | 13.8                                           | 9.6    | 14.0 | 2.7        | 3.3    | 1.6  | 16.5   | 12.9   | 15.6 |

| Fermentation [h] | Cysteine [ $\mu\text{mol g}^{-1}$ ] Proteome |        |      | Metabolome |        |      | Sum    |        |      |
|------------------|----------------------------------------------|--------|------|------------|--------|------|--------|--------|------|
|                  | Sey 38                                       | Bio 19 | 696  | Sey 38     | Bio 19 | 696  | Sey 38 | Bio 19 | 696  |
| 23               | 41.8                                         | 0.0    | 37.0 | 11.3       | 0.0    | 25.4 | 53.2   | 0.0    | 62.4 |
| 28               | 29.2                                         | 35.8   | 34.4 | 4.1        | 12.5   | 5.7  | 33.3   | 48.3   | 40.1 |
| 31               | 27.0                                         | 35.7   | 31.8 | 4.4        | 3.4    | 3.0  | 31.4   | 39.0   | 34.8 |
| 47               | 21.7                                         | 24.7   | 23.3 | 1.6        | 0.0    | 0.0  | 23.3   | 24.7   | 21.6 |
| 53               | 24.5                                         | 24.9   | 24.9 | 0.0        | 0.0    | 0.0  | 22.1   | 23.1   | 21.2 |
| 71               | 23.2                                         | 20.9   | 23.7 | 0.0        | 0.0    | 0.0  | 20.5   | 20.3   | 0.0  |

**Table 3:** Methionine and seleno methionine concentrations during 71 h of fermentation

| Fermentation [h] | Met    |        |      | SeMet  |        |      | Sum Met pool |        |      |
|------------------|--------|--------|------|--------|--------|------|--------------|--------|------|
|                  | Sey 38 | Bio 19 | 696  | Sey 38 | Bio 19 | 696  | Sey 38       | Bio 19 | 696  |
| 23               | 44.0   | 0.0    | 46.1 | 0.0    |        | 0.0  | 44.0         |        | 46.1 |
| 28               | 27.3   | 38.0   | 32.3 | 7.2    | 0.0    | 4.0  | 34.5         | 38.0   | 36.2 |
| 31               | 24.9   | 27.8   | 25.4 | 9.5    | 5.0    | 3.7  | 34.4         | 32.8   | 29.1 |
| 47               | 21.8   | 18.4   | 17.8 | 13.9   | 13.3   | 14.1 | 35.7         | 31.7   | 31.9 |
| 53               | 19.8   | 17.2   | 16.8 | 13.3   | 14.4   | 10.5 | 33.1         | 31.6   | 27.2 |
| 71               | 16.5   | 12.9   | 15.6 | 12.9   | 15.6   | 14.9 | 29.4         | 28.5   | 30.5 |
